# Supplementary material for: Tuning the energy band-gap of crystalline gallium oxide to enhance photocatalytic water splitting: mixed-phase junctions
Source: Royal Society of Chemistry journal article supplement (doi:10.1039/c4ta03193h), 2014-08-15
Supplement: c4ta03193h1.pdf [file c4ta03193h1.pdf]

## Tuning Energy Band-gap of Gallium Oxide Crystalline to Enhance Photoelectrochemical Water Splitting: Mixed-phase Junctions

Ming-Gang Ju<sup>1,2</sup>, Xiang Wang<sup>1,4</sup>, WanZhen Liang<sup>1,3,\*</sup>, Yi Zhao<sup>1,3,\*</sup>, and Can Li<sup>1,4,\*</sup>

<sup>1</sup> Collaborative Innovation Center of Chemistry for Energy Materials, Xiamen University, Xiamen 361005, China

<sup>2</sup> Department of Chemical Physics, University of Science and Technology of China, Hefei 230026, China

<sup>3</sup> State Key Laboratory of Physical Chemistry of Solid Surfaces, and Department of Chemistry, College of Chemistry and Chemical Engineering, Xiamen University, Xiamen 361005, China

<sup>4</sup> State Key Laboratory of Catalysis, Dalian Institute of Chemical Physics, Chinese Academy of Sciences, Dalian National Laboratory for Clean Energy, Dalian 116023, China

(Dated: August 5, 2014)

TABLE I: The calculated lattice constants of  $\alpha$ -Ga<sub>2</sub>O<sub>3</sub> and  $\beta$ -Ga<sub>2</sub>O<sub>3</sub> with the energy cutoff of 520 eV.

|                         | $\alpha$ -Ga <sub>2</sub> O <sub>3</sub> | $\beta$ -Ga <sub>2</sub> O <sub>3</sub> |
|-------------------------|------------------------------------------|-----------------------------------------|
|                         | Calc.                                    | Calc.                                   |
| $a(\text{\AA})$         | 5.05                                     | 12.44                                   |
| $b(\text{\AA})$         |                                          | 3.08                                    |
| $c(\text{\AA})$         | 13.63                                    | 5.87                                    |
| $\gamma(\text{degree})$ |                                          | 103.8                                   |

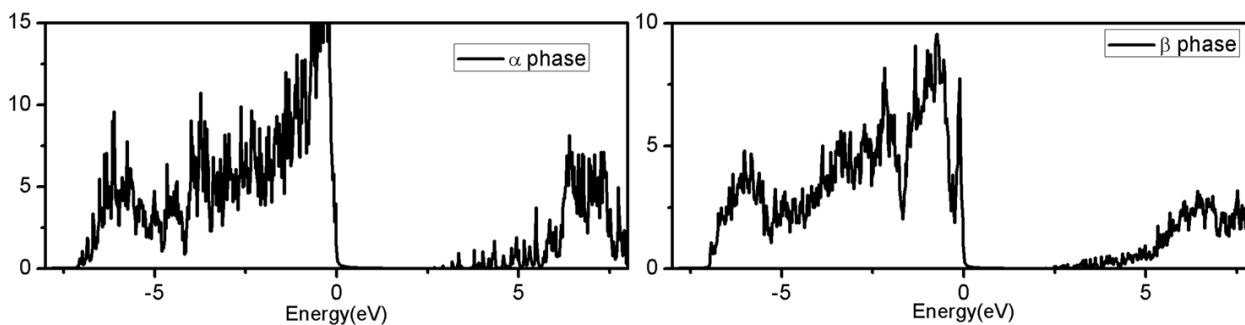

Fig. 1: The total DOS of  $\alpha$ -Ga<sub>2</sub>O<sub>3</sub> and  $\beta$ -Ga<sub>2</sub>O<sub>3</sub> by PBE.

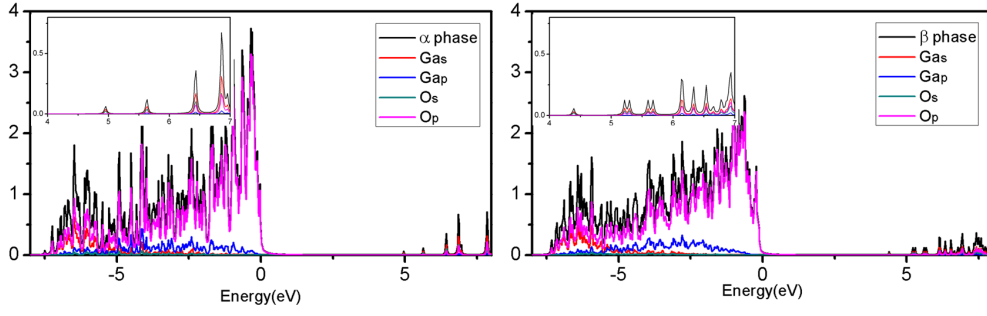

Fig. 2: The total and projected DOS of per formula unit of  $\alpha$ - $\text{Ga}_2\text{O}_3$  and  $\beta$ - $\text{Ga}_2\text{O}_3$  calculated by HSE06 functional. The conduction band are zoom in. The Fermi level is set to zero.

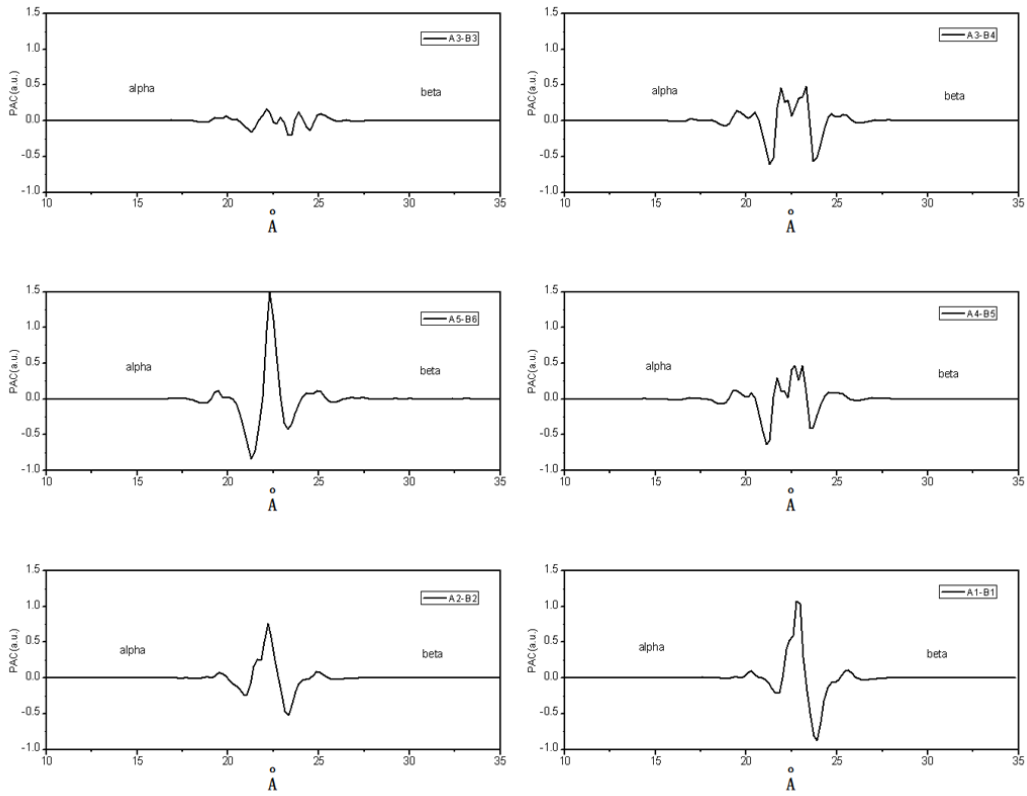

Fig. 3: The differences of PAC for the heterostructures ( $b$ -type) with the crystal axis angle( $101^\circ$ ).

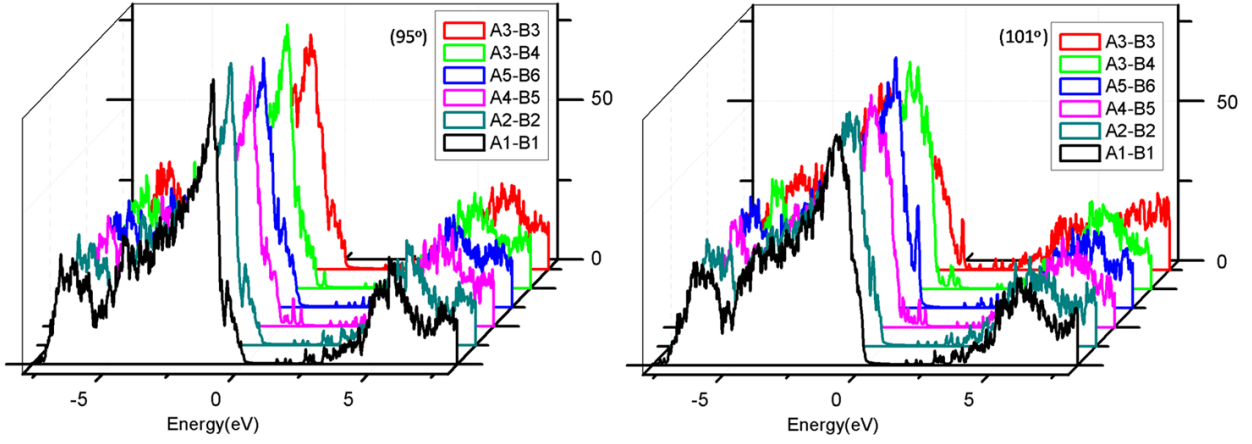

Fig. 4: The total DOS of periodic slab model of the heterostructures( $\mathbf{a}$ ) with the different crystal axis angles  $95^\circ$  (left) and  $101^\circ$  (right).

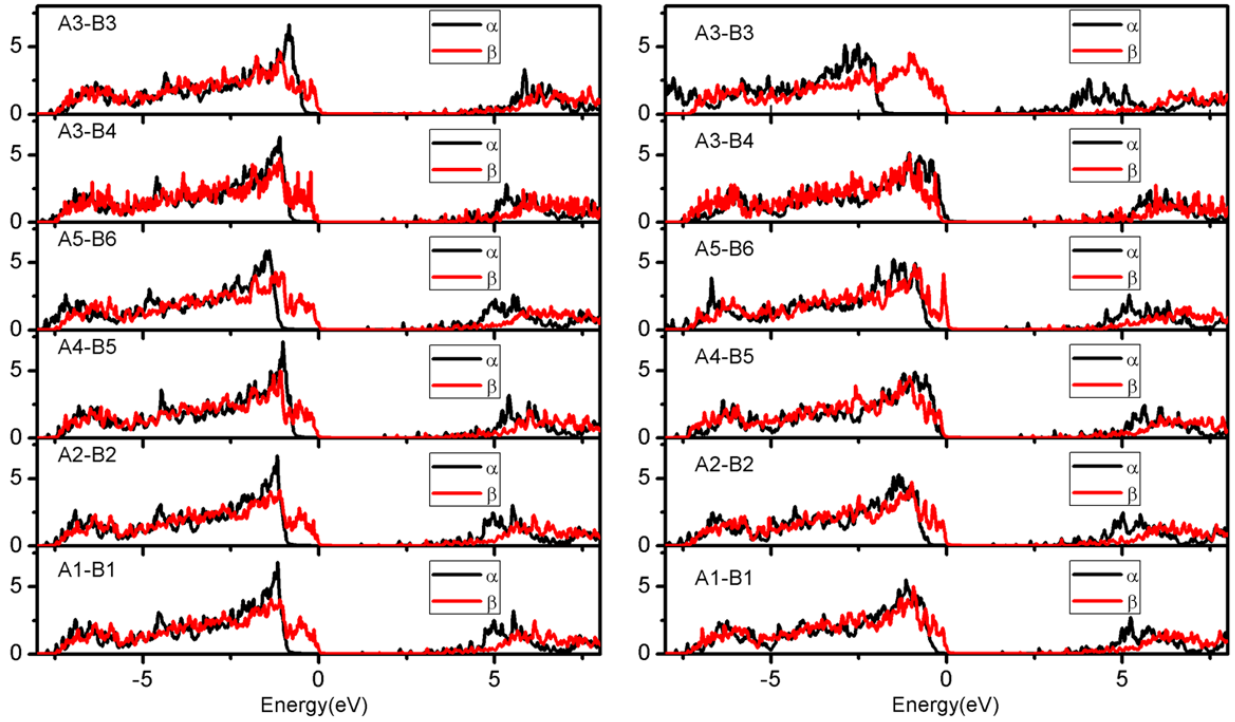

Fig. 5: The LDOS of periodic slab model of the heterostructures( $\mathbf{a}$ ) with the different crystal axis angles  $95^\circ$ , (left) and  $101^\circ$  (right).

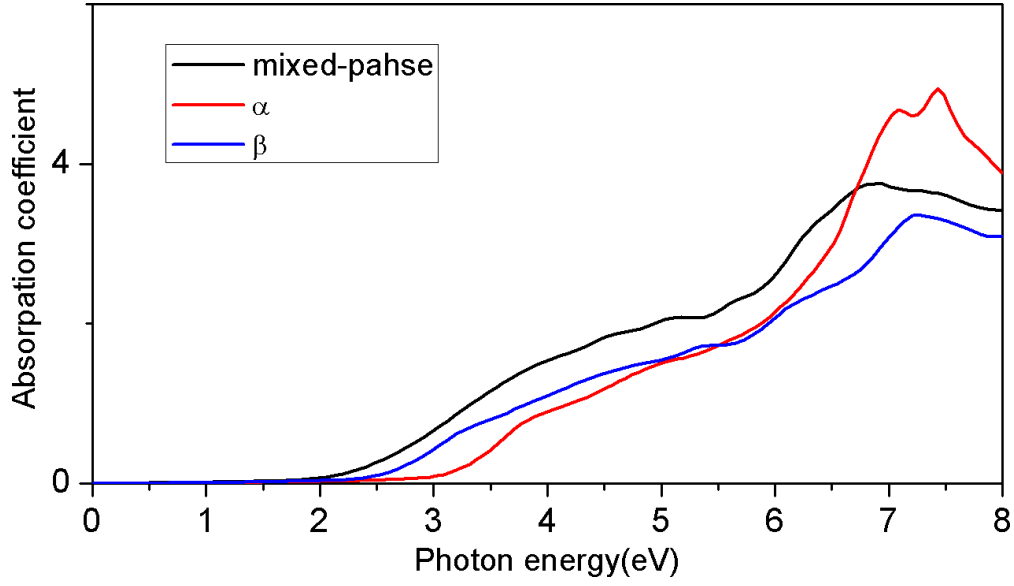

Fig. 6: The optical absorption curves of the mixed-phase and the two pure phases by PBE.

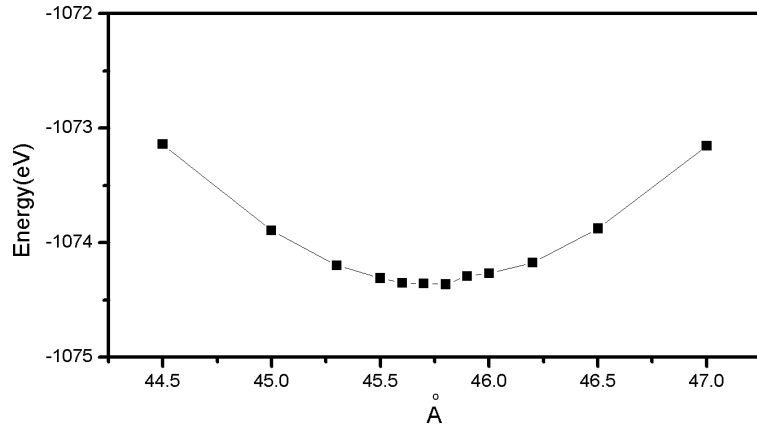

Fig. 7: The calculated energies of  $b$ -type heterostructures A1-B1 with different lengths and the most stable heterostructure with length 45.8 Å. ( $\phi = 101^\circ$ )

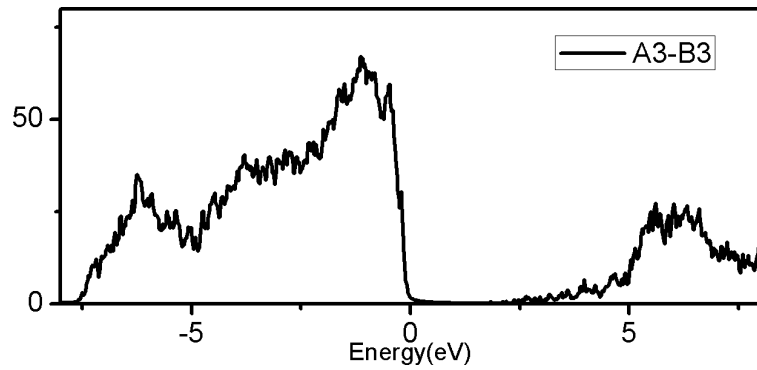

Fig. 8: The total DOS of  $b$ -type heterostructures A1-B1 with length 45.8 Å. ( $\phi = 101^\circ$ )

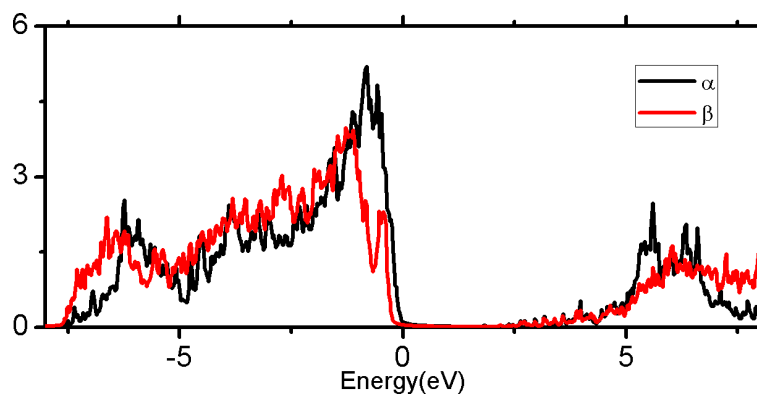

Fig. 9: The LDOSs of *b*-type heterostructures A1-B1 with length 45.8 Å. ( $\phi = 101^\circ$ )

---

\* Electronic address: [liangwz@xmu.edu.cn](mailto:liangwz@xmu.edu.cn), [yizhao@xmu.edu.cn](mailto:yizhao@xmu.edu.cn), [canli@dicp.ac.cn](mailto:canli@dicp.ac.cn)
